# Supplementary material for: Racial-Ethnic Disparities in First-Episode Psychosis Treatment Outcomes From the RAISE-ETP Study
Source: Atypon-hosted journal article supplement (doi:10.1176/appi.ps.201800067), 2018-08-28
Supplement: appi.ps.201800067.ds001.pdf [file appi.ps.201800067.ds001.pdf]

*Unadjusted racial and ethnic differences in clinical characteristics by treatment condition during 24-month treatment period (Beta's, odd ratios, confidence intervals, p values)*

| Clinical Characteristics | Community Care                           |                      |                |             |                     |                |             |                      |                |
|--------------------------|------------------------------------------|----------------------|----------------|-------------|---------------------|----------------|-------------|----------------------|----------------|
|                          | Race/Ethnicity; Non-Hispanic white (REF) |                      |                |             |                     |                |             |                      |                |
|                          | Non-Hispanic Black                       |                      |                | Hispanic    |                     |                | Others      |                      |                |
|                          | $\beta$                                  | 95% CI               | <i>p</i> value | $\beta$     | 95% CI              | <i>p</i> value | $\beta$     | 95% CI               | <i>p</i> value |
| PANSS <sup>a</sup>       |                                          |                      |                |             |                     |                |             |                      |                |
| Total score              | <b>6.42</b>                              | <b>2.11 to 10.72</b> | <b>.003</b>    |             | NS                  |                |             | NS                   |                |
| Negative symptoms        |                                          | NS                   |                |             | NS                  |                |             | NS                   |                |
| Positive symptoms        | <b>3.21</b>                              | <b>1.36 to 5.07</b>  | <b>.001</b>    |             | NS                  |                |             | NS                   |                |
| Disorganized thought     | <b>1.78</b>                              | <b>.67 to 2.89</b>   | <b>.002</b>    |             | NS                  |                |             | NS                   |                |
| Uncontrolled hostility   | <b>.80</b>                               | <b>.15 to 1.46</b>   | <b>.017</b>    |             | NS                  |                | <b>-.81</b> | <b>-1.57 to -.04</b> | <b>.039</b>    |
| Anxiety/depression       |                                          | NS                   |                |             | NS                  |                |             | NS                   |                |
| Service Utilization      | OR                                       | 95% CI               | <i>p</i> value | OR          | 95% CI              | <i>p</i> value | OR          | 95% CI               | <i>p</i> value |
| Medication management    |                                          | NS                   |                |             | NS                  |                |             | NS                   |                |
| Individual therapy       | <b>.45</b>                               | <b>.28 to .72</b>    | <b>.001</b>    | <b>.40</b>  | <b>.18 to .89</b>   | <b>.024</b>    |             | NS                   |                |
| Family psychoeducation   |                                          | NS                   |                | <b>.18</b>  | <b>.05 to .63</b>   | <b>.007</b>    |             | NS                   |                |
|                          | NAVIGATE                                 |                      |                |             |                     |                |             |                      |                |
|                          | Non-Hispanic Black                       |                      |                | Hispanic    |                     |                | Others      |                      |                |
|                          | $\beta$                                  | 95% CI               | <i>p</i> value | $\beta$     | 95% CI              | <i>p</i> value | $\beta$     | 95% CI               | <i>p</i> value |
| PANSS <sup>a</sup>       |                                          |                      |                |             |                     |                |             |                      |                |
| Total score              |                                          | NS                   |                |             | NS                  |                | <b>9.52</b> | <b>.28 to 18.76</b>  | <b>.043</b>    |
| Negative symptoms        |                                          | NS                   |                |             | NS                  |                |             | NS                   |                |
| Positive symptoms        |                                          | NS                   |                |             | NS                  |                |             | NS                   |                |
| Disorganized thought     |                                          | NS                   |                | <b>2.05</b> | <b>.75 to 3.34</b>  | <b>.002</b>    |             | NS                   |                |
| Uncontrolled hostility   |                                          | NS                   |                |             | NS                  |                |             | NS                   |                |
| Anxiety/depression       | <b>1.28</b>                              | <b>.01 to 2.55</b>   | <b>.48</b>     |             | NS                  |                | <b>2.98</b> | <b>.89 to 5.06</b>   | <b>.005</b>    |
| Service Utilization      | OR                                       | 95% CI               | <i>p</i> value | OR          | 95% CI              | <i>p</i> value | OR          | 95% CI               | <i>p</i> value |
| Medication management    |                                          | NS                   |                | <b>2.82</b> | <b>1.68 to 4.74</b> | <b>.001</b>    |             | NS                   |                |
| Individual therapy       |                                          | NS                   |                |             | NS                  |                |             | NS                   |                |
| Family psychoeducation   | <b>.49</b>                               | <b>.30 to .81</b>    | <b>.005</b>    |             | NS                  |                |             | NS                   |                |

<sup>a</sup> Positive and Negative Syndrome Scale. Possible scores range from 30 to 120 with higher scores indicating greater psychosis symptom severity.

<sup>b</sup> Baseline Positive and Negative Syndrome Scale subscale score

*Unadjusted racial and ethnic differences in clinical characteristics by treatment condition during 24-month treatment period (means and SD)*

| Clinical Characteristics | Community Care           |             |                    |               |              |              |              |               |
|--------------------------|--------------------------|-------------|--------------------|---------------|--------------|--------------|--------------|---------------|
|                          | Race/Ethnicity           |             |                    |               |              |              |              |               |
|                          | Non-Hispanic white (REF) |             | Non-Hispanic Black |               | Hispanic     |              | Others       |               |
|                          | M                        | SD          | M                  | SD            | M            | SD           | M            | SD            |
| PANSS <sup>a</sup>       |                          |             |                    |               |              |              |              |               |
| Total score              | <b>65.13</b>             | <b>1.50</b> | <b>71.55</b>       | <b>1.61**</b> | 65.05        | 3.52         | 69.96        | 7.19          |
| Negative symptoms        | 17.37                    | .52         | 17.93              | .62           | 16.96        | 1.67         | 17.09        | 2.63          |
| Positive symptoms        | <b>19.73</b>             | <b>.69</b>  | <b>22.94</b>       | <b>.65***</b> | 18.89        | 1.26         | 23.76        | 2.81          |
| Disorganized thought     | <b>13.08</b>             | <b>.34</b>  | <b>14.86</b>       | <b>.46**</b>  | 13.99        | .92          | 14.64        | 1.93          |
| Uncontrolled hostility   | <b>5.93</b>              | <b>.20</b>  | <b>6.73</b>        | <b>.27*</b>   | 5.80         | .52          | <b>5.12</b>  | <b>.34*</b>   |
| Anxiety/depression       | 8.93                     | .44         | 9.02               | .44           | 9.48         | .68          | 9.28         | .69           |
|                          | NAVIGATE                 |             |                    |               |              |              |              |               |
|                          | Non-Hispanic white (REF) |             | Non-Hispanic Black |               | Hispanic     |              | Others       |               |
|                          | M                        | SD          | M                  | SD            | M            | SD           | M            | SD            |
| PANSS <sup>a</sup>       |                          |             |                    |               |              |              |              |               |
| Total score              | <b>63.61</b>             | <b>1.45</b> | 68.20              | 2.05          | 66.34        | 2.26         | <b>73.13</b> | <b>4.49*</b>  |
| Negative symptoms        | 16.59                    | .56         | 17.53              | .80           | 17.93        | .95          | 19.01        | 1.31          |
| Positive symptoms        | 19.60                    | .61         | 21.00              | .78           | 19.39        | .81          | 21.76        | 1.47          |
| Disorganized thought     | <b>13.44</b>             | <b>.38</b>  | 14.23              | .51           | <b>15.48</b> | <b>.54**</b> | 15.04        | 1.12          |
| Uncontrolled hostility   | 6.02                     | .21         | 6.26               | .35           | 6.19         | .29          | 6.39         | .57           |
| Anxiety/depression       | <b>7.89</b>              | <b>.31</b>  | <b>9.17</b>        | <b>.57*</b>   | 7.40         | .49          | <b>10.87</b> | <b>1.02**</b> |

<sup>a</sup> Positive and Negative Syndrome Scale. Possible scores range from 30 to 120 with higher scores indicating greater psychosis symptom severity.

\*  $p < .05$ , \*\*  $p < .01$ , \*\*\*  $p < .001$ ;

Unadjusted percentage of participant engagement in key services for treatment conditions across the 24-month treatment period by race and ethnicity.

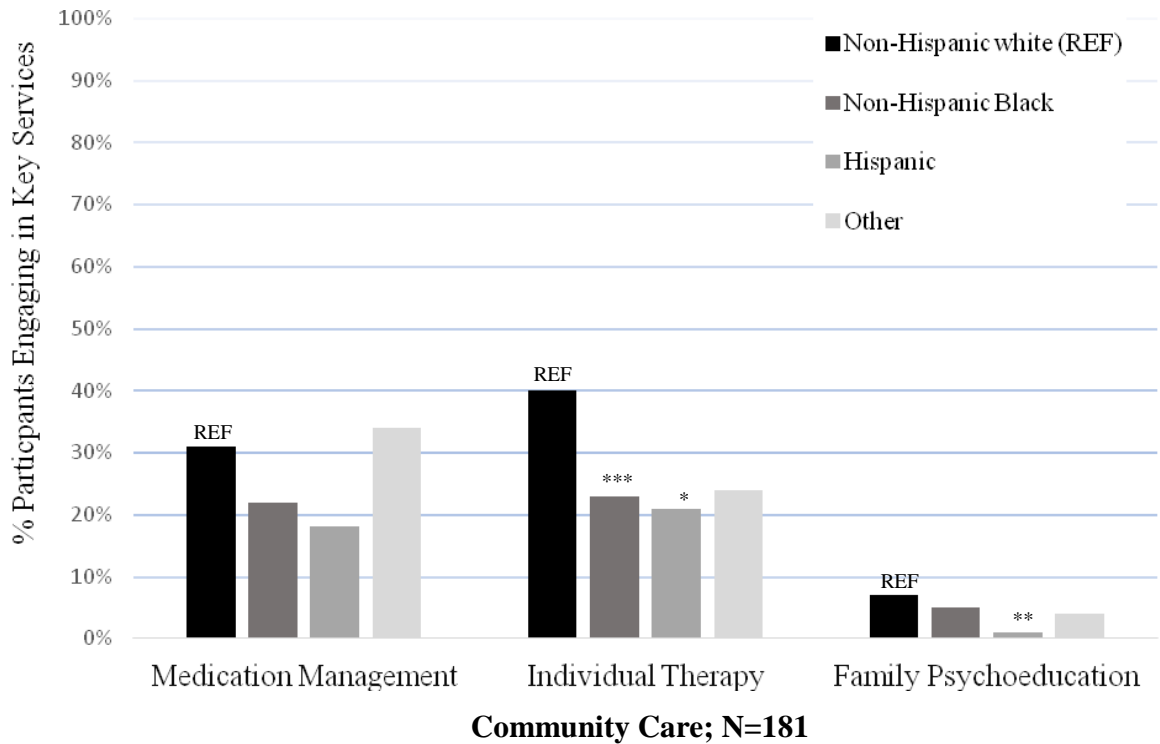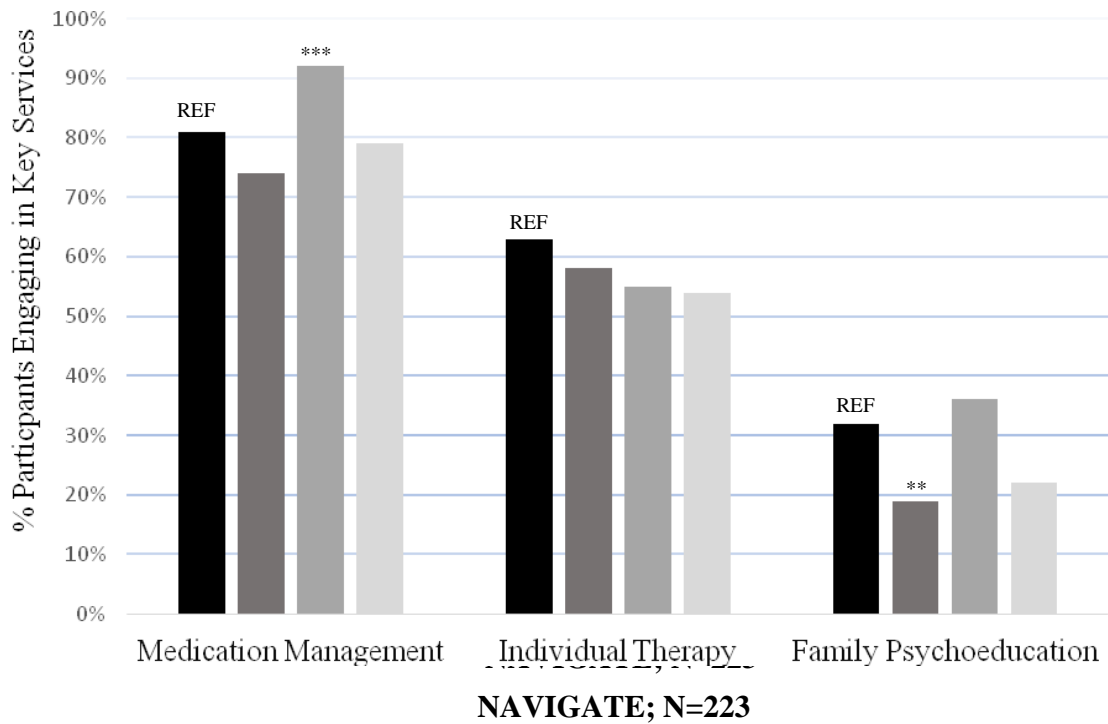

\*\*\* p<.001, \*\* p<.01, \*p<.05
